# Supplementary material for: Salicylic Acid Targets Protein Phosphatase 2A to Attenuate Growth in Plants
Source: PubMed Central journal article supplement (PMC6997888; doi:10.1016/j.cub.2019.11.058), 2020-02-03
Supplement: mmc1.pdf [file mmc1.pdf]

**Current Biology, Volume 30**

**Supplemental Information**

**Salicylic Acid Targets Protein Phosphatase 2A  
to Attenuate Growth in Plants**

**Shutang Tan, Melinda Abas, Inge Verstraeten, Matouš Glanc, Gergely Molnár, Jakub Hajný, Pavel Lasák, Ivan Petřík, Eugenia Russinova, Jan Petrášek, Ondřej Novák, Jiří Pospíšil, and Jiří Friml**

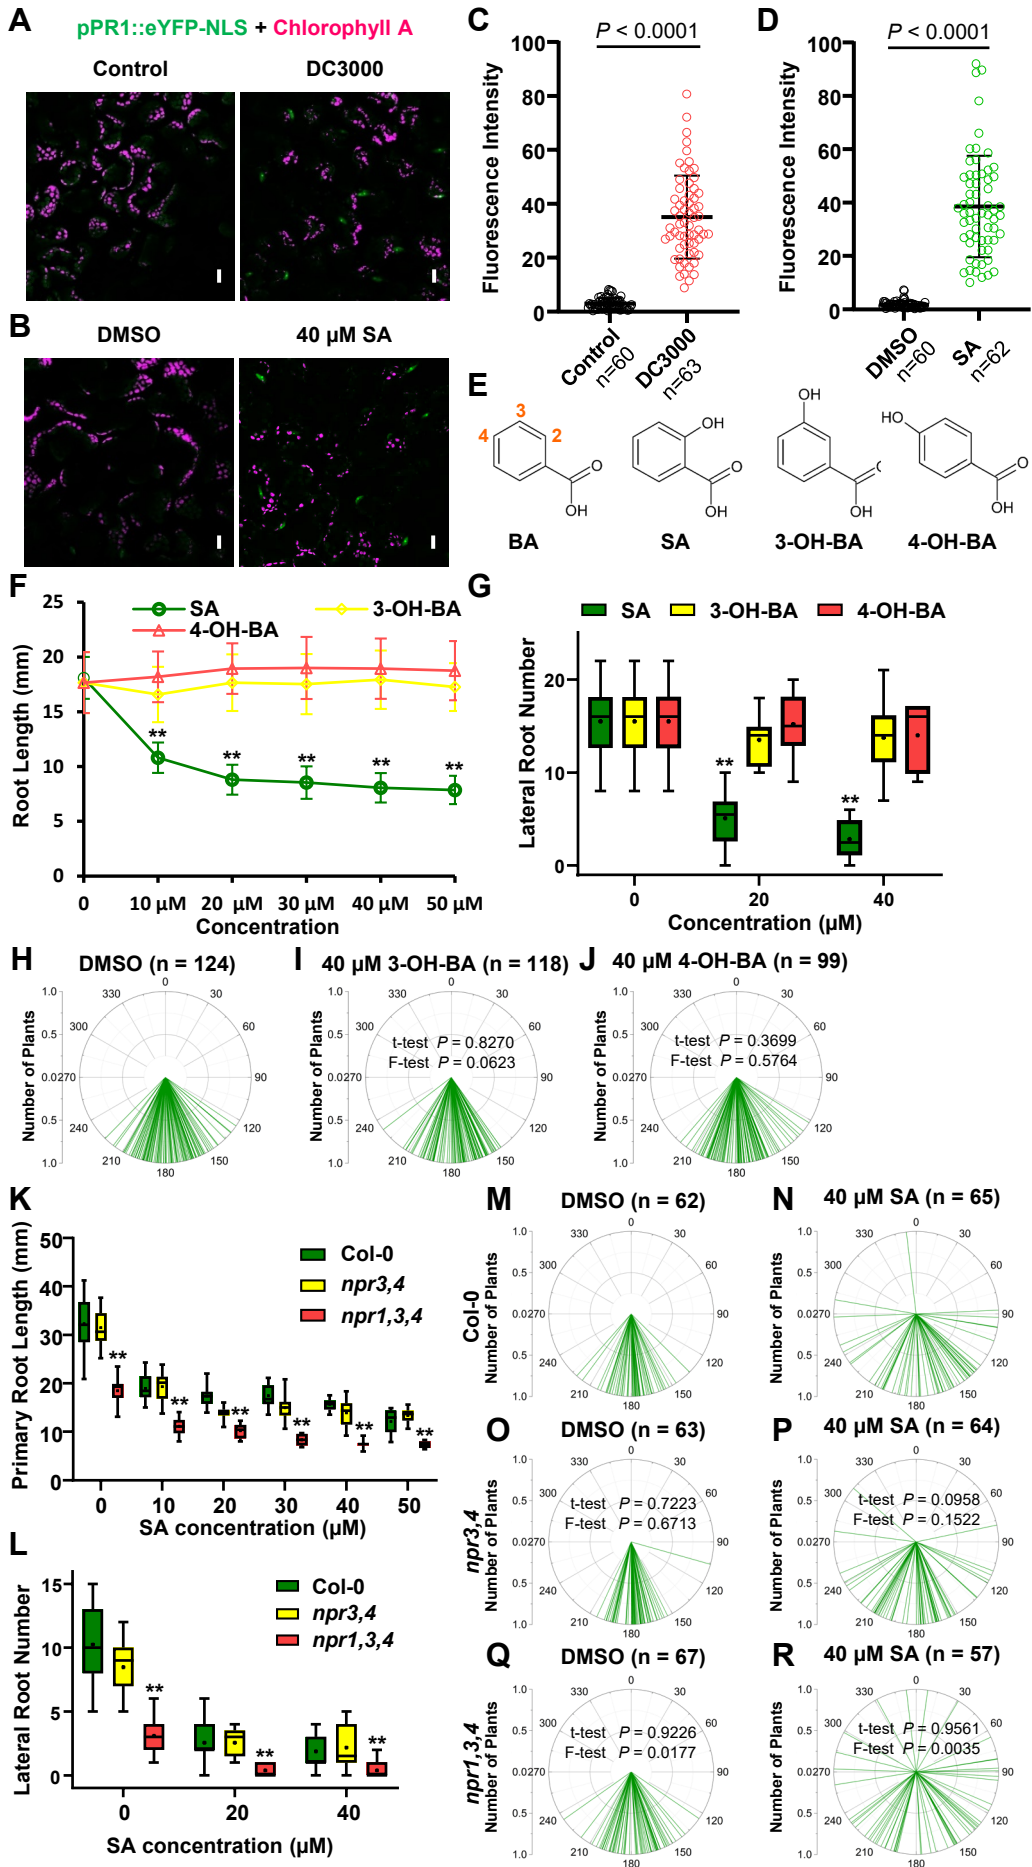

**Figure S1. Structural isomers and the specific role of SA in the root growth regulation. Related to Figures 1 & 2.**

(A-D) Induced *pPRI::eYFP-NLS* expression by *P. syringae* DC3000 (A, C) or SA (B, D) in cotyledons. (A, C) 5-d-old *pPRI::eYFP-NLS* seedlings were treated with *P. syringae* DC3000 ( $OD_{600} = 0.01$ ,  $\sim 5 \times 10^6$  CFU/mL) or with resuspension buffer (control) for 48 h, and were then imaged by CLSM. Scale bars, 10  $\mu$ m. (B, D) Induced *pPRI::eYFP-NLS* expression by SA in cotyledons. 5-d-old *pPRI::eYFP-NLS* seedlings were transferred to plates with DMSO or 40  $\mu$ M SA for 24h, and were then imaged by CLSM. Scale bars, 10  $\mu$ m. For quantification, the average GFP fluorescence of 5-10 representative cells from 10 seedlings for each treatment was measured by Fiji. The data points were shown as dot plots. Dots represent individual values, and lines indicate mean  $\pm$  SD. *P* values were calculated by a two-tailed t-test.

(E) Structures of benzoic acid analogues, including benzoic acid (BA), 2-hydroxybenzoic acid (also known as ortho-salicylic acid, SA), 3-hydroxybenzoic acid (3-OH-BA, also known as meta-salicylic acid), and 4-hydroxybenzoic acid (4-OH-BA, also known as para-salicylic acid). Chemical structures were illustrated with the ChemSketch program.

(F) 3-OH-BA and 4-OH-BA do not inhibit primary root elongation. Root length of 7-d-old Col-0 seedlings grown on MS plates containing different concentrations of SA, 3-OH-BA or 4-OH-BA was measured. Note that the same DMSO control was used for all the indicated chemicals.  $n = 100-129$ . \*\*,  $P < 0.01$ , by a two-tailed t-test.

(G) 3-OH-BA and 4-OH-BA do not repress lateral root formation. The lateral root number of 10-d-old plants was counted. The same DMSO control was used for all the indicated chemicals.  $n = 10-22$ . \*\*,  $P < 0.01$ , by a two-tailed t-test.

(H-J) 3-OH-BA and 4-OH-BA do not have a significant effect on root gravitropism. The root tip angles of 7-d-old Col-0 seedlings on different plates were measured. *P* values were calculated by a two-tailed t-test to evaluate the mean value and by a further F-test to indicate differences of variances.

(K) SA inhibited primary root elongation, which was not suppressed by NPR deficiency. Root length of 7-d-old Col-0, *npr3,4* and *npr1,3,4* seedlings grown on MS plates containing different concentrations of SA was measured.  $n = 10-26$ . \*\*,  $P < 0.01$ . *P* values were calculated by one-way ANOVA with a Tukey multiple comparison test, compared to Col-0 in each treatment.

(L) Inhibition of lateral root formation by SA does not depend on NPRs. The lateral root number of 10-d-old Col-0, *npr3,4* and *npr1,3,4* plants was counted.  $n = 9-24$ . \*\*,  $P < 0.01$ . *P* values were calculated by one-way ANOVA with a Tukey multiple comparison test, compared to Col-0.

(M-R) SA repressed root gravitropism independently of NPRs. The angles of root tips of 7-d-old Col-0 (M, N), *npr3,4* (O, P) and *npr1,3,4* (Q, R) seedlings were measured. *P* values were calculated by a two-tailed t-test to evaluate the mean value and by a further F-test to indicate differences of variances.

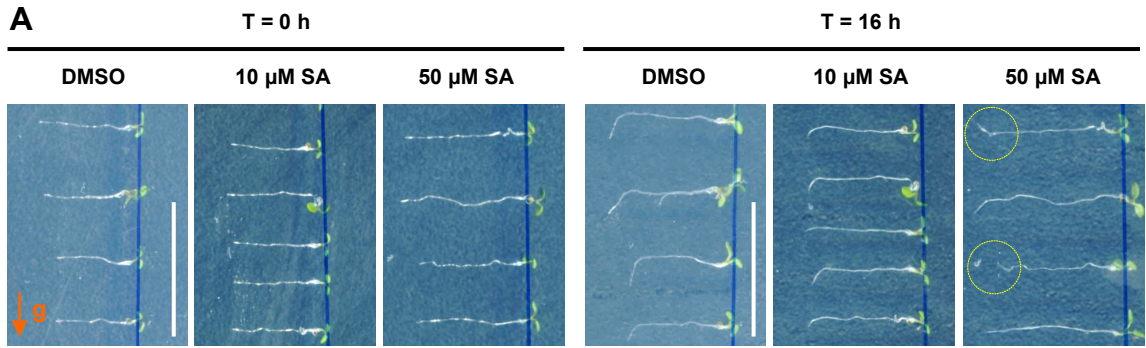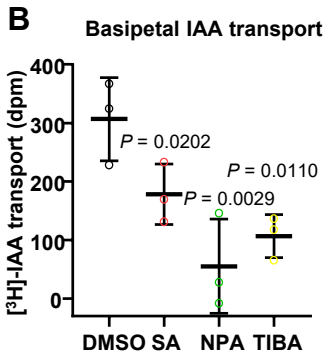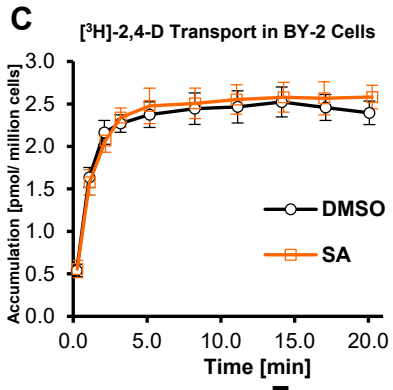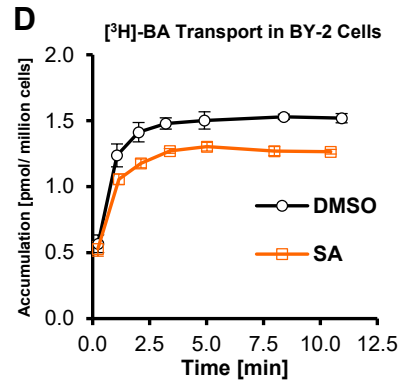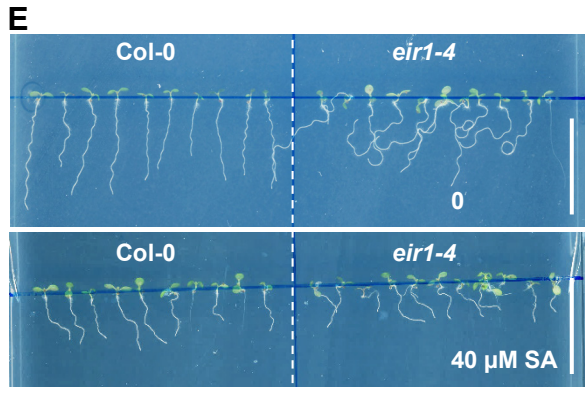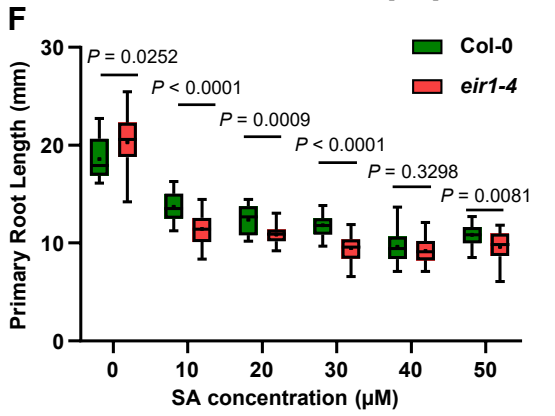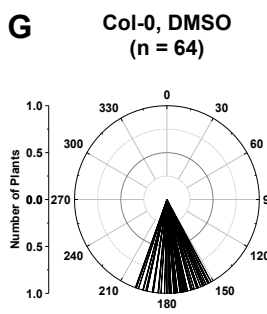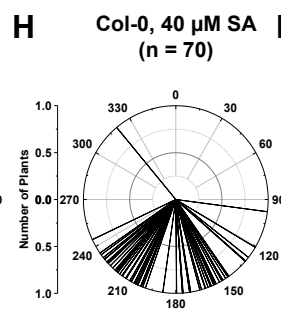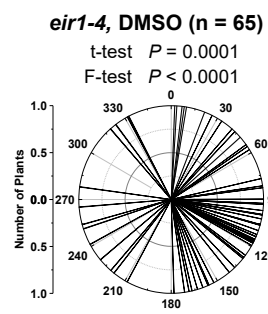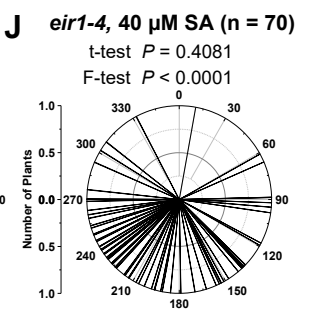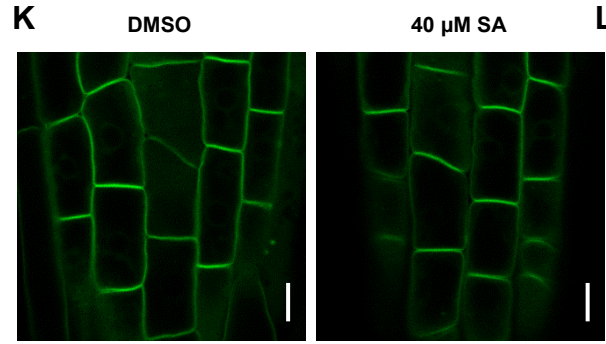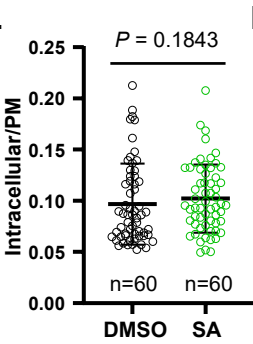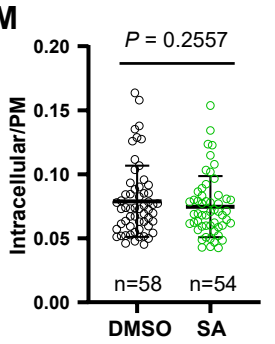

**Figure S2. Specific SA action on root gravitropic response and auxin export, in a PIN-dependent manner. Related to Figure 3.**

(A) Representative images showing the gravitropic response of WT seedlings on different concentrations of SA. 5-d-old seedlings were transferred to indicated plates, and grown for additional 16 h. DMSO as the solvent control. Agravitropic roots are marked. Scale bars, 2 cm.

(B) SA inhibited the basipetal transport of [<sup>3</sup>H]-IAA in etiolated hypocotyls. DMSO, 10 μM NPA, 10 μM TIBA, and 500 μM SA were added to both the [<sup>3</sup>H]-IAA droplets and the medium. 15 seedlings were pooled as a biological replicate; n = 3. Dots represent individual values, and lines indicate mean ± SD. *P* values were calculated by one-way ANOVA with a Tukey multiple comparison test, compared to DMSO.

(C-D) SA has no effect on the accumulation of [<sup>3</sup>H]-2,4-D (C) or [<sup>3</sup>H]-BA (D) in tobacco BY-2 cells, suggesting no effect on export, as controls for [<sup>3</sup>H]-IAA. DMSO (the solvent control) and 200 μM SA were added to the cell culture, and then the radioactivity of <sup>3</sup>H was measured at indicated timepoints after the addition of [<sup>3</sup>H]-2,4-D (C) or [<sup>3</sup>H]-BA (D) to the DMSO- and SA-treated cell cultures. n = 3.

(E) Representative images show the sensitivity of *eir1-4* to SA. Col-0 and *eir1-4* seedlings were grown on plates with different concentrations of SA for 7 d. Scale bars, 2 cm.

(F) *eir1-4* shows slightly increased sensitivity to SA in root growth inhibition. Col-0 and *eir1-4* seedlings were grown on plates with concentrations of SA for 7 d, and the primary root length was measured. n = 16-23; *P* values were calculated by a two-tailed t-test for indicated pairs of Col-0 and *eir1-4* at a certain concentration of SA.

(G-J) *eir1-4* showed agravitropic roots, which were not further enhanced by SA treatment. Col-0 and *eir1-4* seedlings were grown on plates with different concentrations of SA for 7 d, and the root tip angles were measured by Image J, and shown by polar bar charts. *P* values were calculated by a two-tailed t-test to evaluate the mean value and by a further F-test to indicate differences of variances. The *eir1-4* groups were compared with Col-0 under treatment with the same concentration of SA respectively.

(K) The localization of AUX1-YFP. Plants were grown for 4 d on DMSO or 40 μM SA. Scale bars, 10 μm.

(L-M) Quantification of AUX1-YFP subcellular distribution revealed by its intracellular/PM fluorescence ratio. The average AUX1-YFP fluorescence of the intracellular area and PM of 5-10 representative cells from 10 seedlings for each treatment was measured by Fiji. The data points were shown as dot-plots. Dots represent individual values, and lines indicate mean ± s.d.. *P* values were calculated by a two-tailed t-test. (L) 4-d-old seedling grown on plates with 40 μM SA are shown in (K); (M) 4-d-old seedling were treated with 40 μM SA for 12 h.

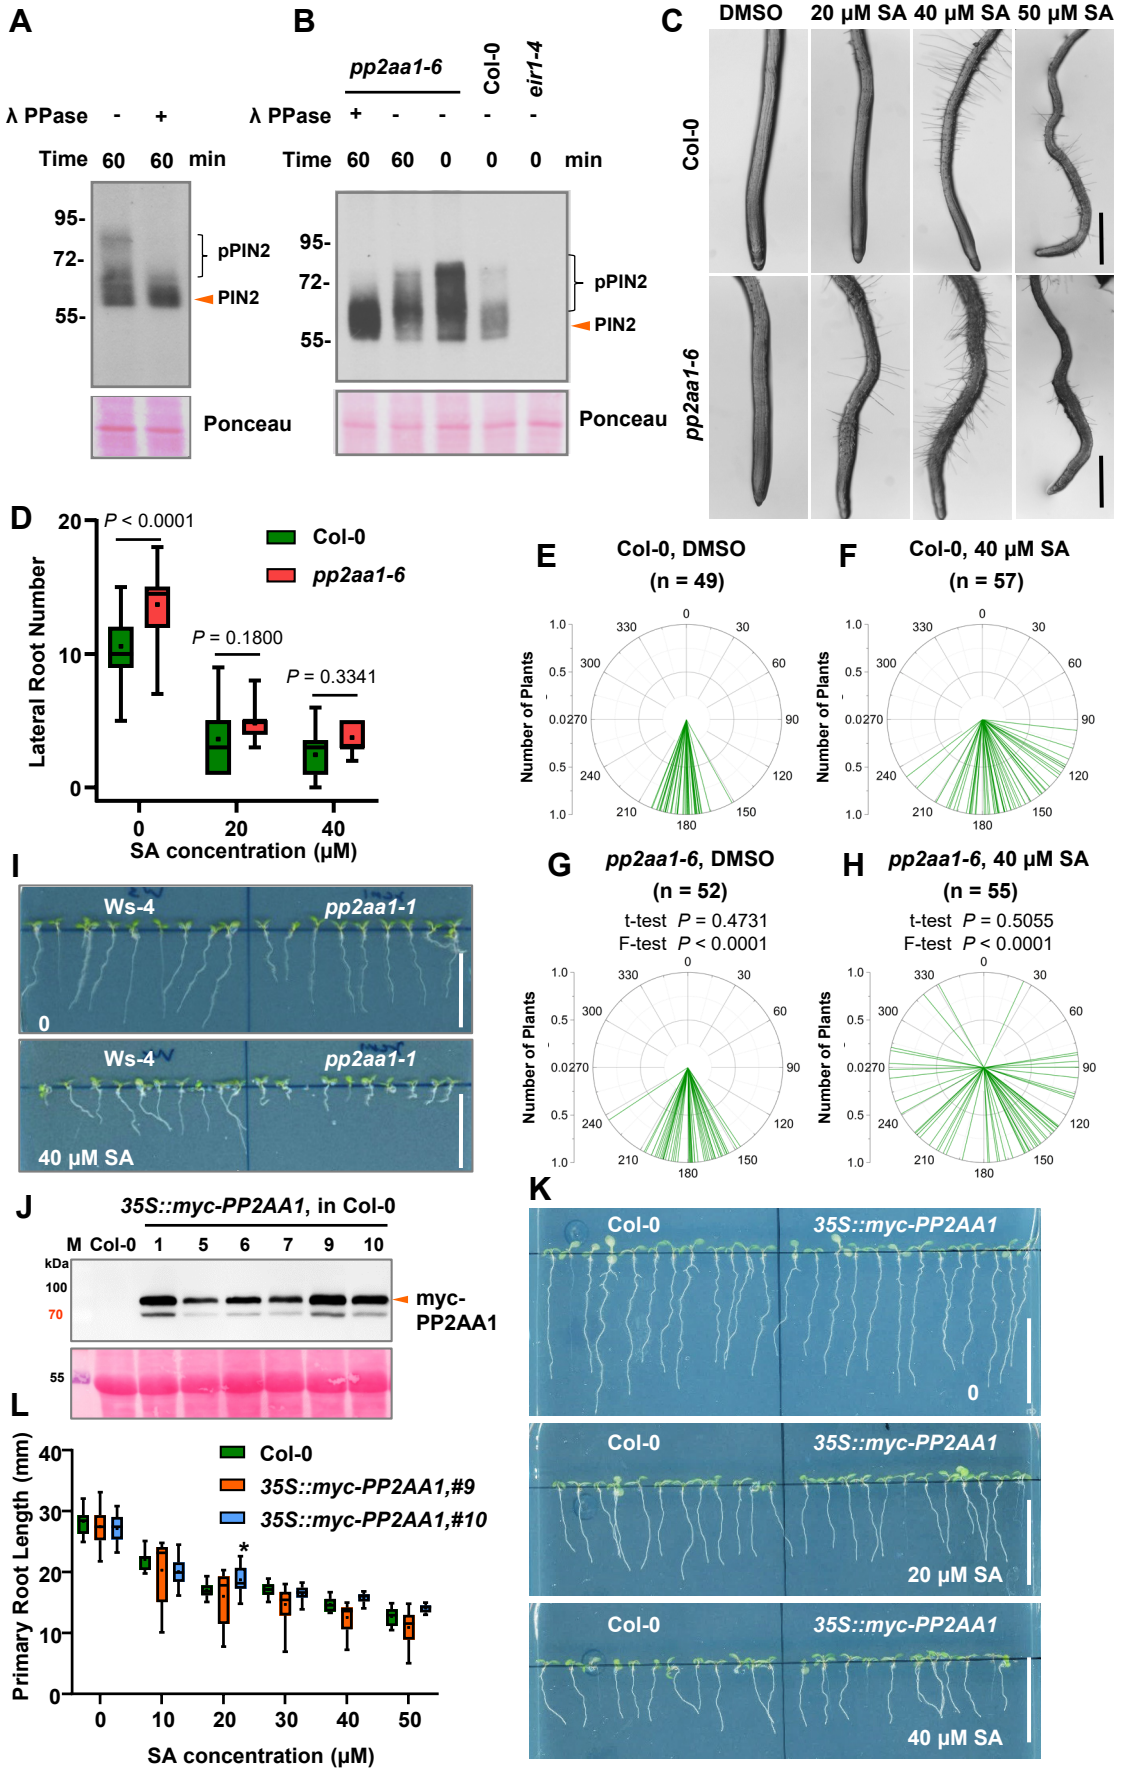

**Figure S3. Deficiency of the PP2A A subunit, PP2AA1 (RCN1), leads to SA hypersensitivity, and SA treatment inhibits PP2A activity *in planta*. Related to Figure 4.**

(A) PIN2 phosphorylation gave rise to shifted smears, revealed by dephosphorylation of PIN2 by lambda phosphatase ( $\lambda$  PPase) *in vitro*. Total membrane extracts were incubated with or without 2 U of  $\lambda$  PPase for the indicated time, and samples were then analysed by Western blot with an anti-PIN2 antibody. Upper, anti-PIN2; bottom, Ponceau staining.

(B) Increase of PIN2 phosphorylation in *pp2aa1-6*. Total membrane extracts from Col-0, *pp2aa1-6*, and *eir1-4* were incubated with or without 5 U  $\lambda$  PPase for the indicated time, and samples were analysed by Western blot with an anti-PIN2 antibody. Upper, anti-PIN2; bottom, Ponceau staining.

(C) Close views of the morphology of Col-0 and *pp2aa1-6* roots under different concentrations of SA. Seedlings were observed by a differential interference contrast (DIC) microscopy. Scale bars, 1 mm.

(D) Sensitivity of *pp2aa1-6* to SA in terms of inhibiting lateral root formation. Col-0 and *pp2aa1-6* seedlings were grown on plates containing different concentrations of SA for 10 d, and the number of emerged lateral root was counted. *P* values were calculated by a two-tailed t-test.

(E-H) Following Figure 4F. *pp2aa1-6* is hypersensitive to SA in terms of interfering with the gravitropic response. Col-0 (E-F) and *pp2aa1-6* (G-H) seedlings were grown on plates containing different concentrations of SA for 7 d, and the root tip angles were measured by Image J, and shown as polar bar charts. *P* values were calculated by a two-tailed t-test to evaluate the mean value and by a further F-test to indicate differences of variances. The *pp2aa1-6* groups were compared with Col-0 under treatment with the same concentration of SA respectively.

(I) Representative images showing hypersensitivity of *pp2aa1-1* to SA. WT (Ws-4) and *pp2aa1-1* seedlings were grown on plates with different concentrations of SA for 7 d. Scale bars, 2 cm.

(J) Western blot verified the expression of myc-PP2AA1. 7-d-old seedlings were subjected to protein extraction and the subsequent Western blot with an anti-myc antibody (1:2000). Upper panel, anti-myc; lower panel, Ponceau staining to show the loading. Lines 9 and 10 ( $T_3$  generation, homozygous lines) were used for further analysis.

(K) Representative images showing the sensitivity of *35S::myc-PP2AA1* to SA. Col-0 and *35S::myc-PP2AA1* seedlings were grown on plates with different concentrations of SA for 7 d. Scale bars, 2 cm.

(L) *35S::myc-PP2AA1* did not show any difference in sensitivity to SA in root growth inhibition. Col-0 and *35S::myc-PP2AA1* seedlings were grown on plates with concentrations of SA for 7 d, and the primary root length was measured.  $n = 11-30$ ; \*,  $P < 0.05$ , by one-way ANOVA with a Tukey multiple comparison test, compared to Col-0.

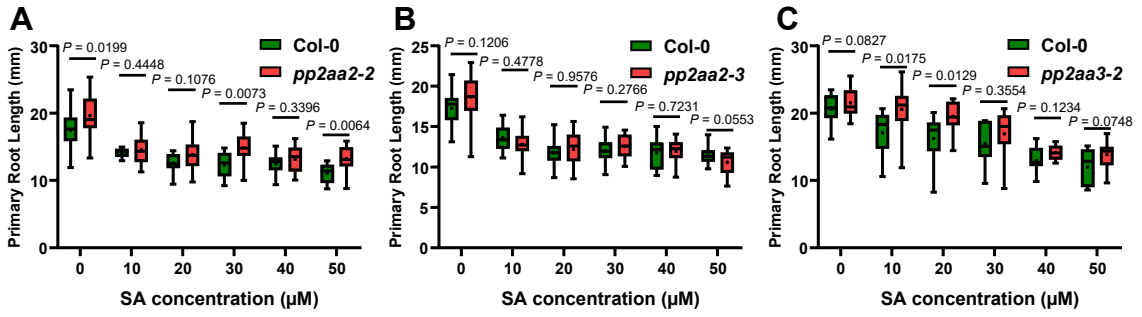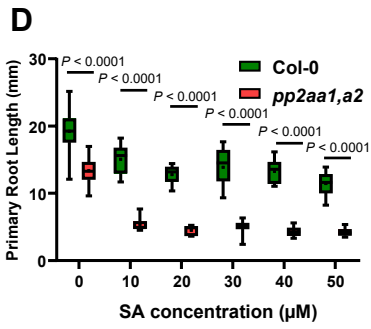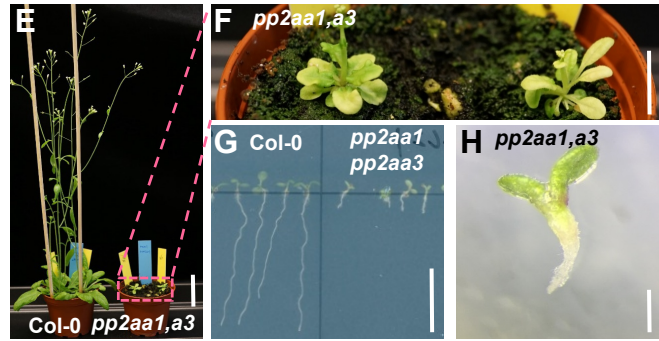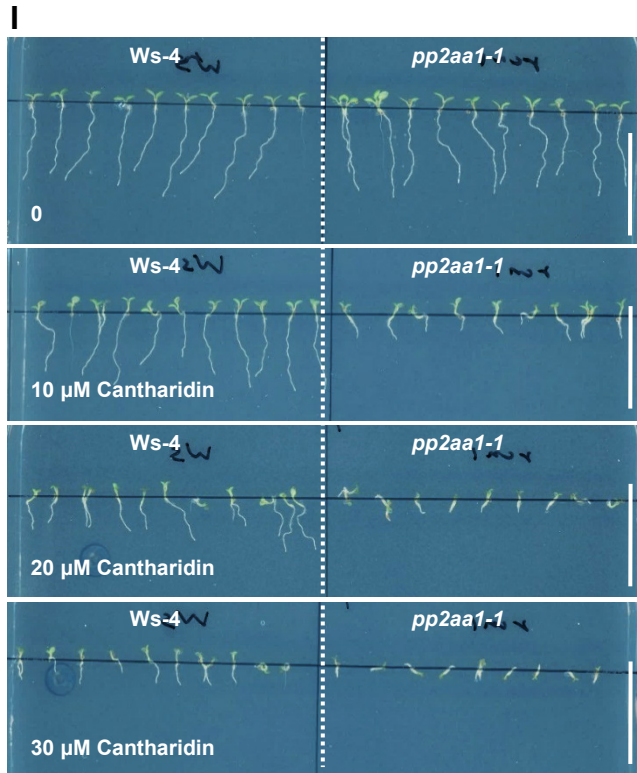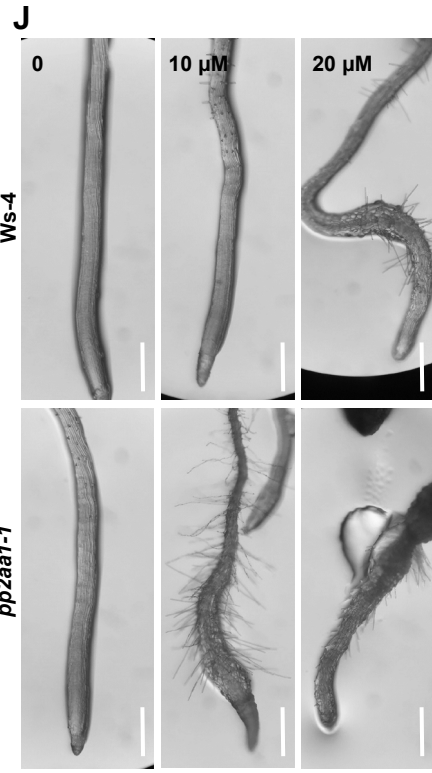

**K**

pTyr

|                 |           |                |                  |               |               |       |        |     |
|-----------------|-----------|----------------|------------------|---------------|---------------|-------|--------|-----|
| PP2AC1          | ISRAHQIVM | EGYNWCQEKNVVTV | FSAPNYCYRCGNMA   | FTIEIGEKMECN  | FLCHDPAPRQVE  | EDTTR | TPLYFL | 306 |
| PP2AC2          | ISRAHQIVM | EGYNWCQIKNVVTV | FSAPNYCYRCGNMA   | FTIEIGENMECN  | FLCHDPAPRQVE  | EDTTR | TPLYFL | 306 |
| PP2AC3          | IARAHQIVM | EGFNWAHEQVVT   | FSAPNYCYRCGNMA   | FTIEVDICRNHT  | FLCEPAPRRCGE  | EDVTR | TPLYFL | 313 |
| PP2AC4          | IARAHQIVM | EGFNWAHEQVVT   | FSAPNYCYRCGNMA   | FTIEVDICRNHT  | FLCEPAPRRCGE  | EDVTR | TPLYFL | 313 |
| PP2AC5          | ISRAHQIVM | EGYNWCQEKNVVTV | FSAPNYCYRCGNMA   | FTIEIGENMDCN  | FLCHDPAPRQVE  | EDTTR | TPLYFL | 307 |
| HsPP2A $\alpha$ | VSRAHQIVM | EGYNWCHIRNVVTV | FSAPNYCYRCGNCA   | FTIMELDITIKYS | FLCHDPAPRRCGE | EHVTR | TPLYFL | 309 |
| MmPP2A $\alpha$ | VSRAHQIVM | EGYNWCHIRNVVTV | FSAPNYCYRCGNCA   | FTIMELDITIKYS | FLCHDPAPRRCGE | EHVTR | TPLYFL | 309 |
| consensus       | rahqlvm   | g nw           | vvt fsapnycyrcgn | a i e         | f qf papr     | ep tr | tpdyfl |     |



**Figure S4. SA sensitivity of the loss-of-function mutants of PP2A subunits, and deficiency of the PP2A A subunit, PP2AA1 (RCN1), leads to hypersensitivity to a known PP2A inhibitor, cantharidin. Related to Figures 4 & 5.**

(A-D) The sensitivity of different PP2A mutants to SA in primary root elongation. Col-0, *pp2aa2-2*, *pp2aa2-3* (a knock-down line), *pp2aa3-2*, and *pp2aa1 pp2aa2-3* (short as *pp2aa1,a2*) seedlings were grown on plates with different concentrations of SA for 7 d, and the primary root length was measured. (A) n = 11-27, (B) n = 12-30, (C) n = 10-28, (D) n = 13-28. *P* values were calculated by a two-tailed t-test for indicated pairs of Col-0 and *pp2aa1, a3* at the given concentration of SA.

(E-H) The double mutant of *pp2aa1 pp2aa3* exhibited deficiency in growth and development with severe root defects, reminiscent of SA- or cantharidin- treatment. Scale bar, 5 cm (E), 1 cm (F), 1 cm (G), and 1 mm (H) respectively.

(I) Representative images showing the hypersensitivity of *pp2aa1-1* to cantharidin. Ws-4 and *pp2aa1-1* seedlings were grown on plates containing different concentrations of cantharidin for 7 d. Scale bars, 2 cm.

(J) Close view of the morphology of Ws-4 and *pp2aa1-1* roots under different concentrations of cantharidin. Scale bars, 1 mm.

(K) Sequence alignment of *Arabidopsis* PP2A C subunits, with their homologues in human (*Homo sapiens*) and mice (*Mus musculus*). All the sequences share 87.13% similarity. The arrowhead indicates the conserved phosphorylation site, which is responsible for PP2Ac activity and is recognized by the pY307-PP2Ac antibody.

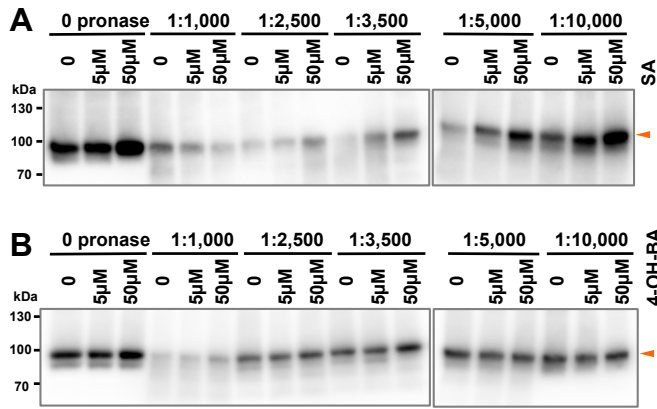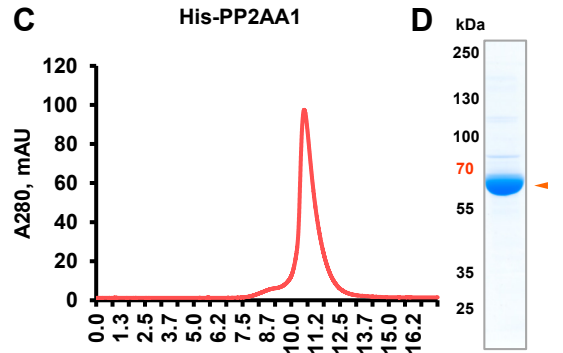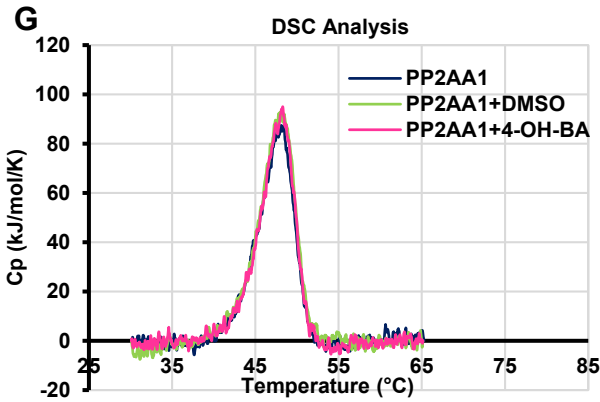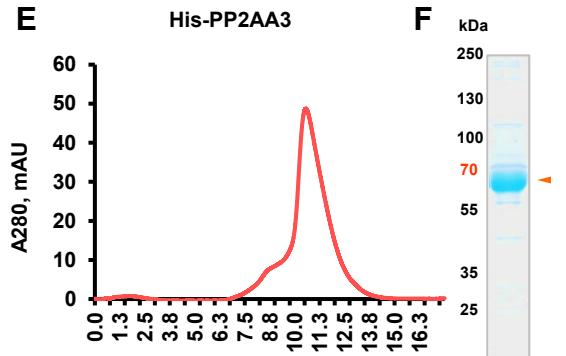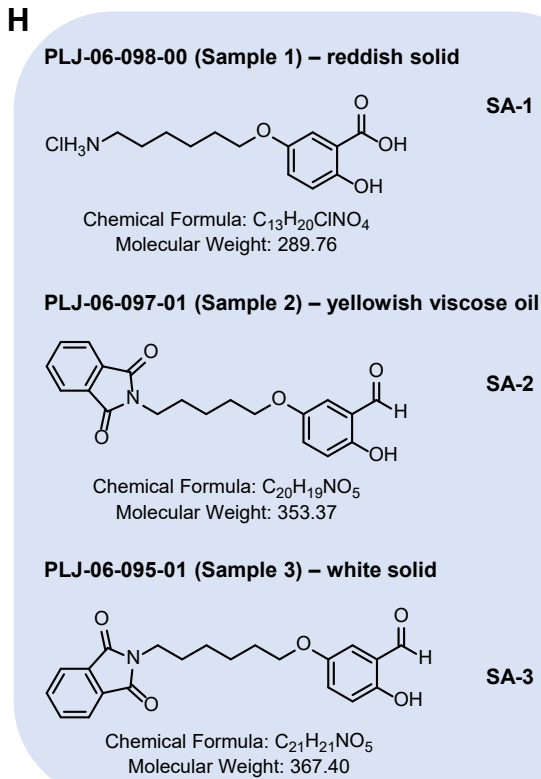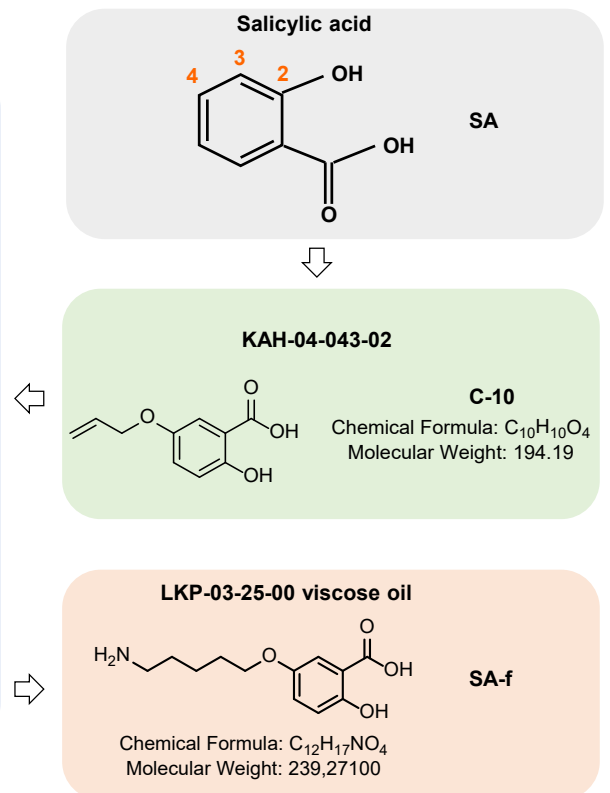

**Figure S5. DARTS assay suggests potential binding of SA to PP2AA1, protein purification of His-PP2AA1 and His-PP2AA3 by Size exclusion chromatography (SEC), and the design flow of the SA analogue, SA-f, for the SPR. Related to Figure 6.**

(A-B) DARTS assay suggests PP2AA1 is potential target of SA. *pPP2AA1::PP2AA1-GFP* seedlings were used for the protein isolation, and Samples were treated with DMSO (mock) and SA (0, 5  $\mu$ M, and 50  $\mu$ M respectively, in A), with 4-OH-BA as a negative control (B), and digested by different concentrations of pronase.

(C) SEC purification of His-PP2AA1 with a Superdex 200 increase column. A representative run is shown here to indicate the purity of recombinant His-PP2AA1 used for DSC and SPR analyses.

(D) SDS-PAGE to check the quality of His-PP2AA1, visualized by CBB staining.

(E) SEC purification of His-PP2AA3.

(F) SDS-PAGE to check the quality of His-PP2AA3, by CBB staining.

(G) DSC analysis of the effect of 4-OH-BA, an inactive SA isomer, on His-PP2AA1 stability. 5  $\mu$ M of purified His-PP2AA1 protein were added with or without DMSO, or 50  $\mu$ M 4-OH-BA, and were then analysed by DSC.  $T_m = 47.57^\circ\text{C}$ ,  $47.69^\circ\text{C}$ , and  $47.69^\circ\text{C}$ , for His-PP2AA1, His-PP2AA1+DMSO, and His-PP2AA1+4-OH-BA respectively.

(H) Workflow for the design of the synthetic SA analogue, SA-f, which can be immobilized on a CM-5 SPR sensor chip. Multiple SA analogues with different groups at different positions of the benzoic ring were synthesized, tested, with C-10 coming out as the best one with activity and the possibility to immobilize it. Further analysis for SA-1/2/3 with a linker and a group to mimic the surface of the matrix of SPR sensor chips, revealed that the linker does not affect the bioactivity of SA.

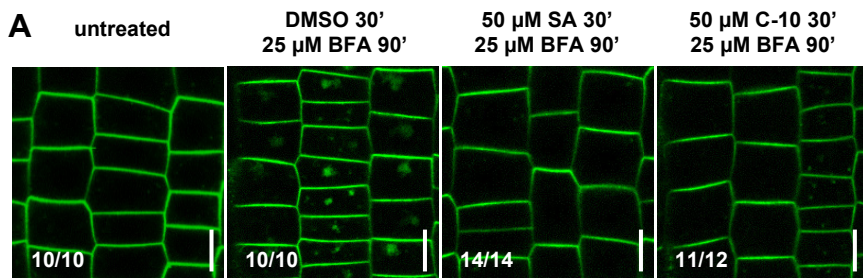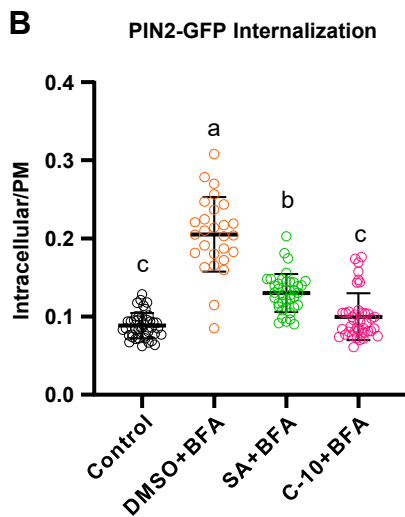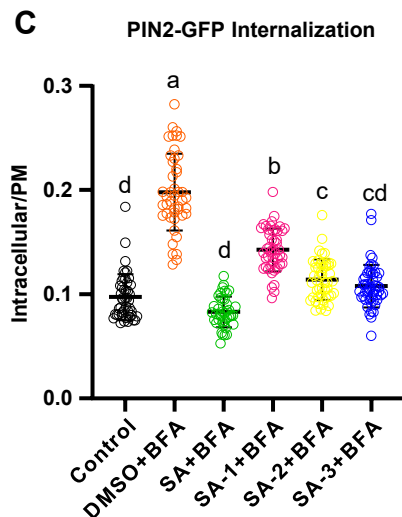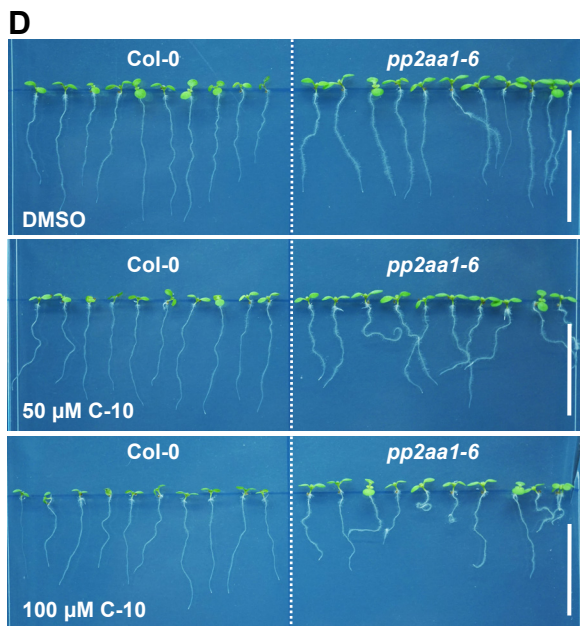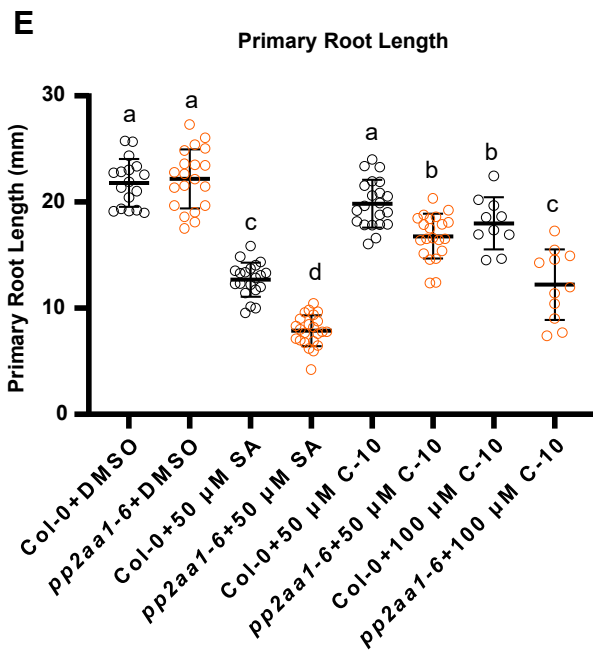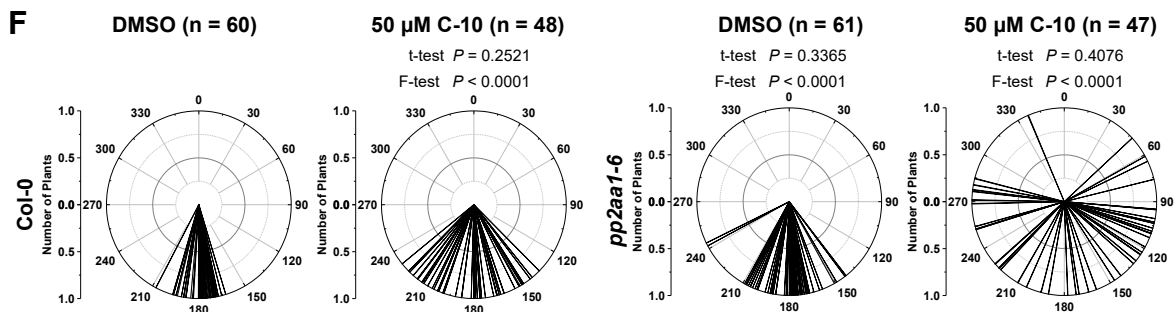

**Figure S6. Bioactivity test of the synthetic SA analogues. Related to Figure 6.**

(A-B) Cellular activity of the synthetic compound, C-10, with the SA moiety, in terms of inhibiting BFA (brefeldin A) body formation. 4-d-old *pPIN2::PIN2-GFP* seedlings were treated with indicated chemicals and imaged by CLSM. (A), representative images, Scale bars, 10  $\mu\text{m}$ ; (B), quantification of the BFA body formation by calculating the intracellular/PM ratio for the PIN2-GFP fluorescence intensity.

(C) Cellular activity of the synthetic compounds, SA-1 to SA-3, in terms of inhibiting BFA body formation. 4-d-old *pPIN2::PIN2-GFP* seedlings were treated with indicated chemicals and imaged by CLSM. Quantification of the BFA body formation by calculating the intracellular/PM ratio for the PIN2-GFP fluorescence intensity.

Dots represent individual values, and lines indicate mean  $\pm$  SD. (B)  $n = 27-42$ ; (C)  $n = 41-50$ . Different letters represent significant difference,  $P < 0.05$ , by one-way ANOVA with a Tukey multiple comparison test.

(D) Physiological activity of the synthetic SA analogue C-10, in terms of root morphology. 7-d-old Col-0 seedlings were grown on plates with indicated chemicals. Scale bars, 2 cm.

(E) C-10 inhibits primary root elongation. Dots represent individual values, and lines indicate mean  $\pm$  SD.  $n = 10-23$ ;  $P$  values were calculated by a two-tailed t-test.

(F) Treatment with C-10 gave rise to less gravitropic roots. The angles of root tips were measured by Image J, and shown as polar bar charts.  $P$  values were calculated by a two-tailed t-test to evaluate the mean value and by a further F-test to indicate differences of variances. For Col-0, C-10 treatments were compared with the DMSO control, and the *pp2aal-6* groups were compared with Col-0 under treatment with the same concentration of C-10 respectively.

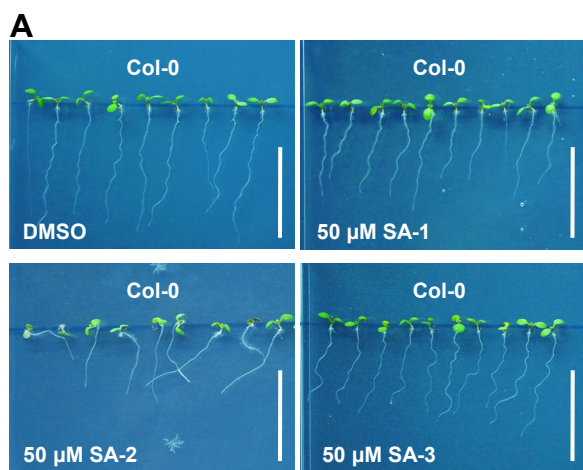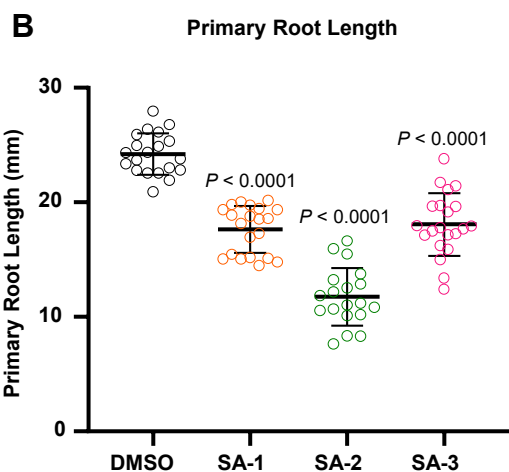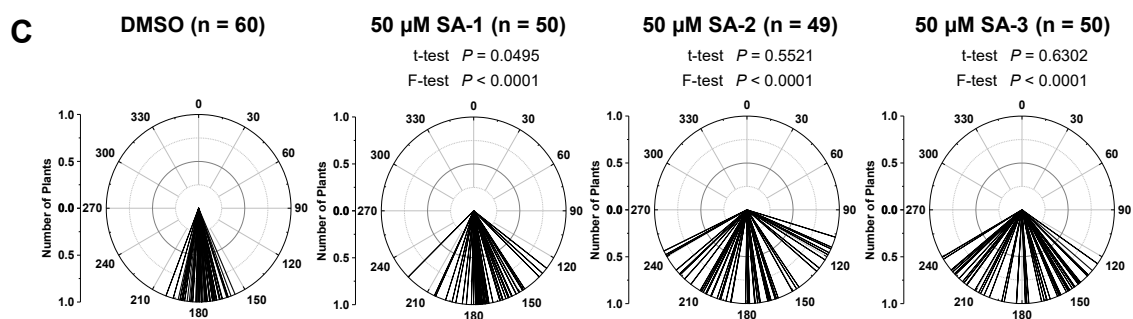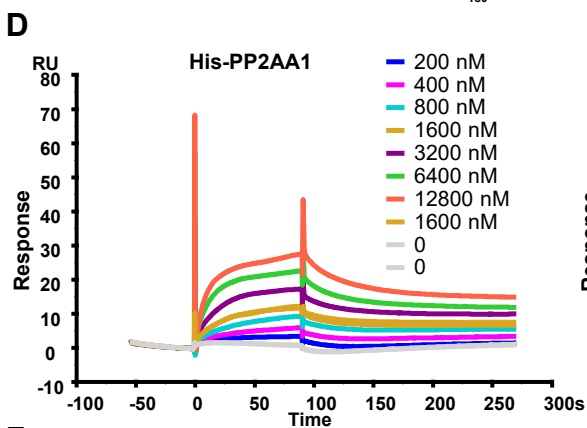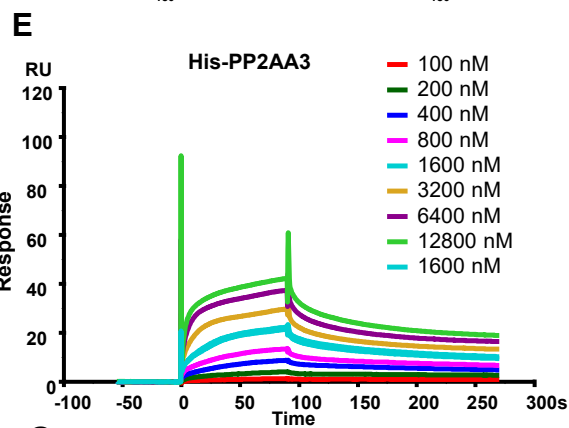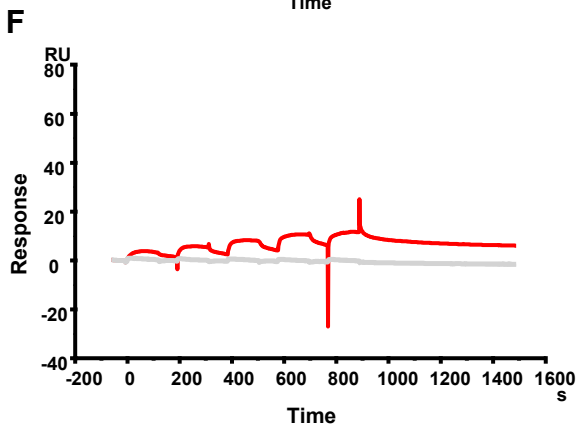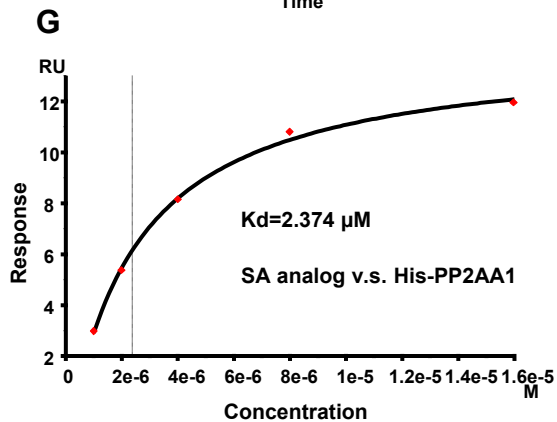

**Figure S7. Physiological test of the SA analogues, and additional data for the binding between SA and His-PP2AA1. Related to Figure 6.**

(A) Physiological activity of the synthetic SA analogues SA-1 to SA-3, in terms of root morphology. 7-d-old Col-0 seedlings were grown on plates with indicated chemicals. Scale bars, 2 cm.

(B) SA analogues (SA-1 to SA-3) inhibit the primary root elongation. Dots represent individual values, and lines indicate mean  $\pm$  SD.  $n = 17-21$ ;  $P$  values were calculated by a two-tailed t-test.

(C) Treatment with SA analogues (SA-1 to SA-3) gave rise to less gravitropic roots. The angles of root tips were measured by Image J, and shown as polar bar charts.  $P$  values were calculated by a two-tailed t-test to evaluate the mean value and by a further F-test to indicate differences of variances in comparison to mock treatment.

(D) SPR assay reveals the binding of His-PP2AA1 to SA. The sensorgram shows the kinetics for the interaction between His-PP2AA1 and SA, used for generating Figure 6C.

(E) SPR assay reveals the binding of His-PP2AA3 to SA. Sensorgram showing the kinetics for the interaction between His-PP2AA3 and SA.

(F-G) SPR revealing the binding between SA and His-PP2AA1. Single cycle binding kinetics was conducted, without regeneration between different concentrations of His-PP2AA1. 0.1% BSA ( $\sim 15 \mu\text{M}$ ) was included in the His-PP2AA1 flow. (F), sensorgram; (G), plotted by the values at steady state. A  $K_d$  value of  $2.374 \mu\text{M}$  was detected.

| <b>Primers</b>        | <b>Oligonucleotide (5' to 3')</b>  | <b>use</b>      |
|-----------------------|------------------------------------|-----------------|
| <b>For Genotyping</b> |                                    |                 |
| <b>Oligo Name</b>     | <b>Sequence</b>                    | <b>Mutants</b>  |
| <i>pp2aa1-1_LP</i>    | AGCACATCCTTCCTTGTGTGAAGG           | <i>pp2aa1-1</i> |
| <i>pp2aa1-1_RP</i>    | AACTTGCTTATGATGTTAAGGCGC           |                 |
| <i>pp2aa1-1_RB</i>    | TGTCCCGCGTCATCGGCGGGGTC            |                 |
| <i>pp2aa1-6_LP</i>    | GGCCAGCCAGTTAGGTATAGG              | <i>pp2aa1-6</i> |
| <i>pp2aa1-6_RP</i>    | AAACATAGCCACACGCATTTC              |                 |
| <i>pp2aa2-1_LP</i>    | CGATGTTACGTGCCCTCTTAC              | <i>pp2aa2-1</i> |
| <i>pp2aa2-1_RP</i>    | TCTACCGAATGACCATTTTGC              |                 |
| <i>pp2aa2-3_LP</i>    | ATTGGTTATTTGGGATCGGAG              | <i>pp2aa2-3</i> |
| <i>pp2aa2-3_RP</i>    | ACTCTCCCTCATCTGAGAGCC              |                 |
| <i>pp2aa3-1_LP</i>    | TATTTCCAAACTTTGGGGGAC              | <i>pp2aa3-1</i> |
| <i>pp2aa3-1_RP</i>    | ATGGACACAGCTTGAAGATGG              |                 |
| <i>pp2aa3-2_LP</i>    | GCACCAAGCTTCTCATCAAAG              | <i>pp2aa3-2</i> |
| <i>pp2aa3-2_RP</i>    | GACCGGAGCCAACTAGGTAAG              |                 |
| LB1                   | GCCTTTTCAGAAATGGATAAATAGCCTTGCTTCC | SAIL lines      |
| LBb1.3                | ATTTTGCCGATTCGGAAC                 | SALK lines      |
| <i>pp2ac3-1-LP</i>    | GCTTGAAAGAACAGCATTTCG              | <i>pp2ac3-1</i> |
| <i>pp2ac3-1-RP</i>    | GTGGATTATCACCATCCATCG              |                 |
| <i>pp2ac4-1-LP</i>    | TAATTGGTATCAGGGCACTGC              | <i>pp2ac4-1</i> |
| <i>pp2ac4-1-RP</i>    | TGTTTCCTGATCTGTTTTCCG              |                 |
| <i>npr1-1-F</i>       | CGTGTGCTCTTCATTTGCTGT              | <i>npr1-1</i>   |
| <i>npr1-1-R</i>       | GTGCGGTTCTACCTTCCAAAGTT            |                 |
| <i>npr3-1-F</i>       | GAGTCAGATATCACTCTAGATCAAGC         | <i>npr3-1</i>   |
| <i>npr3-1-R</i>       | GGAAAGAACAACCTGAGCAAGCCCCA         |                 |
| <i>npr4-3-F</i>       | CGGATCTTGTTTCGTCATTTTCAG           | <i>npr4-1</i>   |
| <i>npr4-3-R</i>       | CAAACGTGAAATCTGAAGCATTAGC          |                 |
| <i>sid2-3-LP</i>      | ACCCTAATTTGGATTTGGTGC              | <i>sid2-3</i>   |
| <i>sid2-3-RP</i>      | AGCTCTAGGCCTAGTTGCAGC              |                 |
| <b>For Cloning</b>    |                                    |                 |
| <b>Oligo Name</b>     | <b>Sequence</b>                    | <b>Plasmid</b>  |



|                 |                                   |               |
|-----------------|-----------------------------------|---------------|
| PIN2HL-1(EcoRI) | TGGAATTCGCTAAGCTTCTCATCTCCGAGC    | pET28a-PIN2HL |
| PIN2HL-2(SalI)  | CCGGTCGACACTCGCCGGCGGCATCTGCTG    |               |
| PP2AA1-1(EcoRI) | GGAATTCATGGCTATGGTAGATGAACCGTTG   | pET28a-PP2AA1 |
| PP2AA1-2(XhoI)  | CCGCTCGAGGGATTGTGCTGCTGTGGAACCATC |               |
| PP2AA3-1(EcoRI) | GGAATTCATGTCTATGGTTGATGAGCCTTTA   | pET28a-PP2AA3 |
| PP2AA3-2(XhoI)  | CCGCTCGAGGCTAGACATCATCACATTGTC    |               |

**Table S1. List of primers used in this study. Related to STAR METHODS and Key Resources Table.**
